# Supplementary material for: Biowaste derived sustainable carbon aerogels/polyvinylidene fluoride composites for effective removal of organic pollutants/oils
Source: Research Square preprint supplement (doi:10.21203/rs.3.rs-2412840/v1), 2023-02-08
Supplement: Supplementary file 1 [file 02f246066c0f74235df9bcc9.docx]

**Supporting Information**

Biowaste derived sustainable carbon aerogels/polyvinylidene fluoride composites for effective removal of organic pollutants/oils

Lin Zhu* ⋅ Wenjing Zheng ⋅ Hongbo Xie ⋅ Kan Zhang*

Research School of Polymer Materials, School of Materials Science & Engineering, Jiangsu University, 301 Xuefu Road, Zhenjiang 212013, P. R. China

Tel.: +86 511 88780191, fax: +86 511 88781947, E-mail: lzhu@ujs.edu.cn (Lin Zhu), zhangkan@ujs.edu.cn (Kan Zhang)

**Materials and Methods**

**Adsorption experiment of PPCA/PVDF towards phenol**

Batch mode adsorption experiments were conducted to investigate the adsorption of phenol on the PPCA/3%PVDF sample. The specific experimental process is as follows. A fixed amount of sample is added into a 100 ml conical flask containing 50ml phenol solution of certain concentration. The concentration of phenol after adsorption was determined by measuring the absorbance values using a Shimadzu UV-2550 spectrophotometer.

The influence of adsorption time (12~72 h) and initial phenol concentration (10~80 mg L-1) on the removal of phenol was investigated. The amount of phenol adsorbed at time *t* (*Qt*) and the percentage of phenol removal (*R*) were calculated by the following formulas, respectively:

*R*(%) = (*C0*-*Ct*)/*C0*×100 (S1)

*Qt* = (*C0*-*Ct*)×*V*/*m* (S2)

where *C0* (mg L-1) and *Ct* (mg L-1) represent the phenol concentration initially and at time *t*, respectively. *V* (L) is the solution volume and *m* (g) is the adsorbent weight.

**Adsorption kinetic models**

Four kinetic models (Pseudo-first order model, Pseudo-second order model, Intraparticle diffusion model and Elovich kinetic model) were used to study the adsorption kinetics of phenol onto PPCA600/3%PVDF sample. These various models could be expressed as follows [1-3]:

Pseudo-first order model: log(*qe*–*qt*) = log*qe*–(*k1*/2.303)*t* (S3)

Pseudo-second order model: *t*/*qt* = 1/(*k2qe*2) + *t*/*qe* (S4)

Intraparticle diffusion model: *qt* = *kdt*1/2 + *C* (S5)

Elovich kinetic model: *qt*= 1/*β* ln(*αβ*) + 1/*β*ln*t* (S6)

In these models, where *qe* (mg g-1) and *qt* (mg g-1) represented the mass of phenol adsorbed per unit mass of PPCA600/3%PVDF at adsorption equilibrium and time *t*, respectively. In Pseudo-first order model, *k1* (min-1) represented the adsorption rate constant. In pseudo-second order model, *k2*(g mg-1 min-1) was the second-order reaction rate constant for adsorption kinetic. In the intraparticle diffusion model, *C* (mg g-1) was the intercept for the *qt*versus *t*1/2 plot and *kd* was the intraparticle diffusion rate constant (mg g-1 min-1/2). In the Elovich kinetic model, *α* (mg g-1 min-1) was the initial sorption rate constant and the parameter *β* (g mg-1) was related to rate of chemisorption. All of the kinetic constants and correlation coefficients could be calculated from the slope and intercept of the plots, respectively.

**Adsorption equilibrium models**

In this work, the Langmuir and Freundlich isotherms are used to investigate the adsorption process of phenol onto PPCA600/3%PVDF. First, the Langmuir isotherm can be expressed as follow [4],

*Ce*/*qe*= *Ce*/*qm* + 1/*KLqm* (S7)

where *Ce* (mg L-1) represented the equilibrium concentration and *qe*(mg g-1) represented the amount of adsorbate adsorbed in the solution. *qm* (mg g-1) was the adsorption capacity of the monolayer on the surface of the unit adsorbent when the saturation of adsorption was reached. *KL* (L mg-1) was the adsorption equilibrium constant which was connected to the apparent energy of the adsorption process.

Second, the Freundlich isotherm can be expressed as follow [5],

ln*qe* = ln*KF* + 1/*n* ln*Ce* (S8)

where *qe*(mg g-1) is the amount of adsorption, *KF* (mg g-1) is the Freundlich constant related to adsorption capacity and 1/*n* is a constant related to energy or intensity of adsorption.

**References**

1. Doğan M, Özdemir Y, Alkan M (2007) Adsorption kinetics and mechanism of cationic methyl violet and methylene blue dyes onto sepiolite. Dyes Pigments, 75(3): 701-713.

2. Asfaram A, Fathi MR, Khodadoust S, Naraki M (2014) Removal of Direct Red 12B by garlic peel as a cheap adsorbent: kinetics, thermodynamic and equilibrium isotherms study of removal. Spectrochim Acta A 127: 415-421.

3. Ho YS (2006) Review of second-order models for adsorption systems. J Hazard Mater 136: 681-689.

4. Kumar KV, Sivanesan S (2006) Equilibrium data, isotherm parameters and process design for partial and complete isotherm of methylene blue onto activated carbon. J Hazard Mater 134(1): 237-244.

5. Febrianto J, Kosasih AN, Sunarso J, et al. (2009) Equilibrium and kinetic studies in adsorption of heavy metals using biosorbent: A summary of recent studies. J Hazard Mater 162: 616-645.

6. Malik PK (2004) Dye removal from wastewater using activated carbon developed from sawdust: adsorption equilibrium and kinetics. J Hazard Mater 113: 81-88.

**Figures**


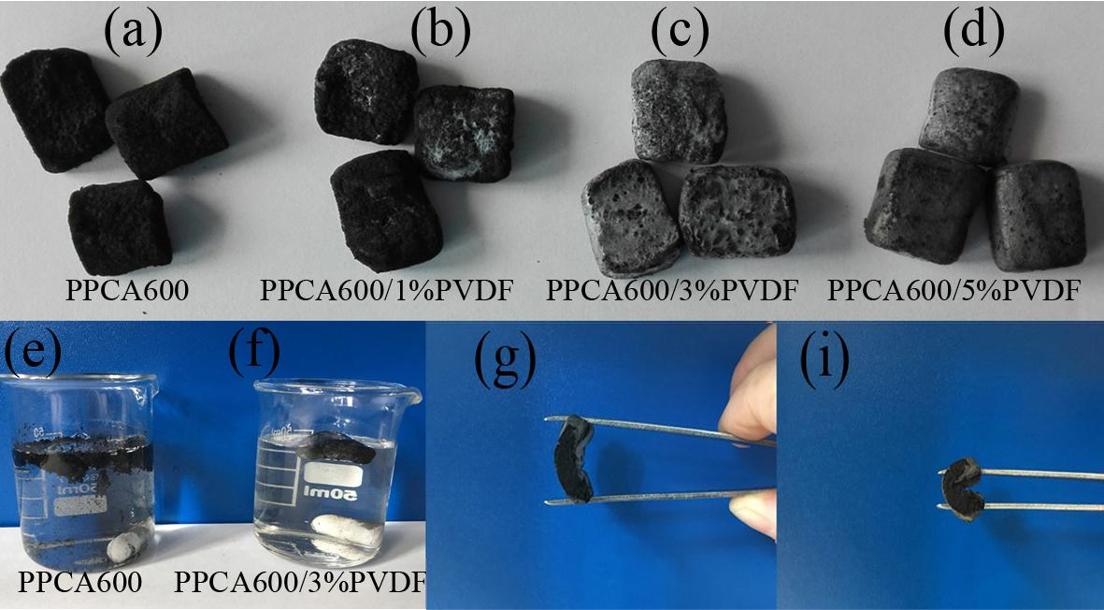


Fig. S1. Photographs of PPCA600 (a) and PPCA600/PVDF composites with different content of PVDF (b-d), and the images show the mechanical properties of them (e-i).


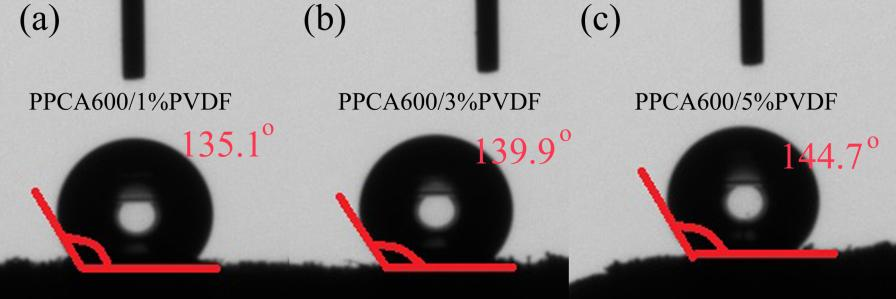


Fig. S2. The water contact angle images of different PPCA600/PVDF composites.
